# Supplementary material
Source: MDPI journal article supplement (https://www.mdpi.com/2036-7481/13/3/46)
Supplement: s1 [file s1]

**Table S1.** Yeast strains used in the present study.

| <b>Yeast</b>                        | <b>Region of origin</b>  |
|-------------------------------------|--------------------------|
| <i>H. guilliermondii</i> E16NL8     | Nemea                    |
| <i>H. guilliermondii</i> Y9         | Athens                   |
| <i>H. guilliermondii</i> E34NL3     | Nemea                    |
| <i>H. uvarum</i> E41PL12            | Peza                     |
| <i>H. uvarum</i> E7NL10a            | Nemea                    |
| <i>H. uvarum</i> CECT10389          | Reference strain (Spain) |
| <i>I. orientalis</i> E46PL8         | Peza                     |
| <i>I. orientalis</i> E316PL14       | Peza                     |
| <i>I. orientalis</i> Y6             | Athens                   |
| <i>I. orientalis</i> E312NL5        | Nemea                    |
| <i>H. osmophila</i> 26NL15          | Nemea                    |
| <i>L. thermotolerans</i> Y7         | Athens                   |
| <i>L. thermotolerans</i> E224PL4    | Peza                     |
| <i>L. thermotolerans</i> CECT 10387 | Reference strain (Spain) |
| <i>L. thermotolerans</i> E322NL2    | Nemea                    |
| <i>M. pulcherrima</i> E43PL16       | Peza                     |
| <i>M. pulcherrima</i> E21NL4        | Nemea                    |
| <i>M. pulcherrima</i> E21NL6        | Nemea                    |
| <i>M. pulcherrima</i> SIGMO MP11    | Reference strain         |
| <i>M. carribica</i> E427PL17        | Peza                     |
| <i>M. carribica</i> E427PL21        | Peza                     |
| <i>Pichia</i> sp.                   | Peza                     |
| <i>P. anomala</i> E314PL9           | Peza                     |
| <i>P. anomala</i> E517PL12          | Peza                     |
| <i>P. anomala</i> E21NL6            | Nemea                    |
| <i>P. anomala</i> E21NL4            | Nemea                    |
| <i>S. bacillaris</i> E312NL11       | Nemea                    |
| <i>S. bacillaris</i> E34PL51        | Peza                     |
| <i>S. bacillaris</i> Y14            | Athens                   |
| <i>S. bacillaris</i> CECT 31235     | Reference strain (Spain) |
| <i>T. delbrueckii</i> E14NL6        | Nemea                    |
| <i>T. delbrueckii</i> E14NL13       | Nemea                    |
| <i>T. delbrueckii</i> TO2           | Reference strain         |
